# Supplementary material for: Enhancing interfacial charge transfer in mesoporous MoS2/CdS nanojunction architectures for highly efficient visible-light photocatalytic water splitting
Source: Royal Society of Chemistry journal article supplement (doi:10.1039/d1qi01278a), 2021-12-23
Supplement: d1qi01278a1.pdf [file d1qi01278a1.pdf]

## Electronic Supplementary Information

### **Enhancing Interfacial Charge Transfer in Mesoporous MoS<sub>2</sub>/CdS Nanofunction Architectures for Highly Efficient Visible-Light Photocatalytic Water Splitting**

Chrysanthi Patriarchea,<sup>a</sup> Ioannis Vamvasakis,<sup>a</sup> Eirini D. Koutsouroubi,<sup>a</sup> Gerasimos S.

Armatas<sup>\*a</sup>

<sup>a</sup>Department of Materials Science and Technology, University of Crete, Heraklion 70013, Greece. E-mail: [garmatas@materials.uoc.gr](mailto:garmatas@materials.uoc.gr)

**Table S1.** Comparison of H<sub>2</sub>-production activities for different reported MoS<sub>2</sub>/CdS-based photocatalysts.

| Photocatalyst                                     | Reaction Conditions                                                               | Light Source                           | H <sub>2</sub> evolution rate |                                          | Quantum Efficiency (QE) | Ref. |
|---------------------------------------------------|-----------------------------------------------------------------------------------|----------------------------------------|-------------------------------|------------------------------------------|-------------------------|------|
|                                                   |                                                                                   |                                        | ( $\mu\text{mol h}^{-1}$ )    | ( $\mu\text{mol g}^{-1} \text{h}^{-1}$ ) |                         |      |
| 0.2 wt.% MoS <sub>2</sub> /CdS                    | 100 mg catalyst, 10 % v/v lactic acid                                             | 300 W Xe lamp ( $\lambda \geq 420$ nm) | 540                           | 5400                                     | -                       | [1]  |
| 0.2 wt.% MoS <sub>2</sub> /CdS                    | 100 mg catalyst, 10 % v/v lactic acid                                             | 300 W Xe lamp ( $\lambda \geq 420$ nm) | 533                           | 5330                                     | 7.3% at 420 nm          | [2]  |
| 0.9 mol% MoS <sub>2</sub> /CdS NPs                | 100 mg catalyst, 10 % v/v lactic acid                                             | 300 W Xe lamp ( $\lambda > 420$ nm)    | 1315                          | 13150                                    | -                       | [3]  |
| 6.9 wt.% feather-shaped MoS <sub>2</sub> /CdS     | 50 mg catalyst, 0.5 M Na <sub>2</sub> S, 0.5 M Na <sub>2</sub> SO <sub>3</sub>    | 300 W Xe lamp ( $\lambda \geq 400$ nm) | 192                           | 3840                                     | -                       | [4]  |
| 20 wt.% MoS <sub>2</sub> NSs/CdS NPs              | 20 mg catalyst, 10 % v/v lactic acid                                              | 300 W Xe lamp ( $\lambda \geq 400$ nm) | 137                           | 6850                                     | 10.5% at 450 nm         | [5]  |
| 15 wt.% MoS <sub>2</sub> /CdS NPs                 | 80 mg catalyst, 0.1 M Na <sub>2</sub> S, 0.02 M Na <sub>2</sub> SO <sub>3</sub>   | 300 W Xe lamp ( $\lambda \geq 400$ nm) | 382                           | 4770                                     | -                       | [6]  |
| 2 wt.% monolayer MoS <sub>2</sub> /CdS            | 200 mg catalyst, 0.35 M Na <sub>2</sub> S, 0.35 M Na <sub>2</sub> SO <sub>3</sub> | 300 W Xe lamp ( $\lambda \geq 400$ nm) | 2100                          | 10500                                    | 30.2% at 420 nm         | [7]  |
|                                                   | 200 mg catalyst, 10 % v/v lactic acid                                             |                                        | 2590                          | 12950                                    | 38.4% at 420 nm         |      |
| 2 wt.% MoS <sub>2</sub> /CdS microspheres         | 100 mg catalyst, 10 % v/v lactic acid                                             | 300 W Xe lamp ( $\lambda > 400$ nm)    | 406                           | 4060                                     | -                       | [8]  |
| 2.5 wt.% MoS <sub>2</sub> flowerlike/CdS nanorods | 50 mg catalyst, 10 % v/v lactic acid                                              | 300 W Xe lamp ( $\lambda > 400$ nm)    | 551                           | 11026                                    | 31.8% at 420 nm         | [9]  |
| 20 wt.% 2D MoS <sub>2</sub> /0D CdS               | 50 mg catalyst, 20 % v/v lactic acid                                              | 300 W Xe lamp ( $\lambda > 400$ nm)    | 84.8                          | 1696                                     | 23.0% at 420 nm         | [10] |
| 10 wt.% MoS <sub>2</sub> NSs/CdS nanowires        | 20 mg catalyst, 20 % v/v lactic acid                                              | 300 W Xe lamp ( $\lambda \geq 400$ nm) | 1914                          | 95700                                    | 46.9% at 420 nm         | [11] |
| MoS <sub>2</sub> /CdS NPs                         | 60 mg catalyst, 10 % v/v lactic acid                                              | 300 W Xe lamp ( $\lambda \geq 420$ nm) | 314                           | 5240                                     | 1.0% at 420 nm          | [12] |
| 10 wt.% MoS <sub>2</sub> NSs/CdS nanorods         | 200 mg catalyst, 10 % v/v lactic acid                                             | 300 W Xe lamp ( $\lambda \geq 420$ nm) | 9960                          | 49800                                    | 41.4% at 420 nm         | [13] |
| 6.0 wt.% MoS <sub>2</sub> NSs/CdS nanorods        | 10 mg catalyst, 20 % v/v lactic acid                                              | Natural solar irradiation              | 174                           | 174000                                   | -                       | [14] |
| 1.0 wt.% MoS <sub>2</sub> /CdS NSs                | 50 mg catalyst, 0.5 M Na <sub>2</sub> S, 0.5 M Na <sub>2</sub> SO <sub>3</sub>    | 300 W Xe lamp ( $\lambda > 400$ nm)    | 87                            | 1740                                     | -                       | [15] |
|                                                   | 50 mg catalyst, 20 % v/v lactic acid                                              |                                        | 436                           | 8720                                     |                         |      |
| MoS <sub>2</sub> /CdS                             | 20 mg catalyst, 25                                                                | 300 W Xe lamp                          | 775                           | 38750                                    | 14.7%                   | [16] |

|                                                |                                                                                    |                                                         |            |              |                                   |                  |
|------------------------------------------------|------------------------------------------------------------------------------------|---------------------------------------------------------|------------|--------------|-----------------------------------|------------------|
| nanomaterials (molar ratio of Mo:Cd=1:6)       | % v/v lactic acid                                                                  | ( $\lambda \geq 420$ nm)                                |            |              | at 420 nm                         |                  |
| 2 wt.% monolayer MoS <sub>2</sub> /CdS         | 200 mg catalyst, 30 % v/v lactic acid, NaOH (pH~5)                                 | 300 W Xe lamp ( $\lambda \geq 420$ nm)                  | 1020       | 5100         | -                                 | [17]             |
| CdS@MoS <sub>2</sub> -5% irregular nanospheres | 50 mg catalyst, 0.25 M Na <sub>2</sub> S, 0.35 M Na <sub>2</sub> SO <sub>3</sub>   | 300 W Xe lamp ( $\lambda \geq 420$ nm)                  | 860        | 17203        | 24.2% at 420 nm                   | [18]             |
| 6.39 wt.% MoS <sub>2</sub> /CdS NSs            | 100 mg catalyst, 0.35 M Na <sub>2</sub> S, 0.25 M Na <sub>2</sub> SO <sub>3</sub>  | 300 W Xe lamp ( $\lambda \geq 420$ nm)                  | 3.7        | 370          | 0.65% at 420 nm                   | [19]             |
| 5 wt.% MoS <sub>2</sub> NSs/CdS particles      | 80 mg catalyst, 0.45 M Na <sub>2</sub> S, 0.55 M Na <sub>2</sub> SO <sub>3</sub>   | 300 W Xe lamp ( $\lambda \geq 420$ nm)                  | 372        | 4650         | 7.3% at 420 nm                    | [20]             |
| 3 wt.% MoS <sub>2</sub> /CdS hybrids           | 100 mg catalyst, 0.35 M Na <sub>2</sub> S, 0.25 M Na <sub>2</sub> SO <sub>3</sub>  | 300 W Xe lamp ( $\lambda \geq 420$ nm)                  | 114        | 11400        | 1.2% at 420 nm                    | [21]             |
| 0.25 wt.% MoS <sub>2</sub> QDs/CdS             | 50 mg catalyst, 10 % v/v lactic acid                                               | 300 W Xe lamp ( $\lambda \geq 420$ nm)                  | 1032       | 206420       | 35.1% at 420 nm                   | [22]             |
|                                                | 50 mg catalyst, 1.0 M (NH <sub>4</sub> ) <sub>2</sub> SO <sub>3</sub>              |                                                         | 863        | 172600       | 29.3 % at 420 nm                  |                  |
| 20 wt.% 1T MoS <sub>2</sub> NSs/CdS nanorods   | 10 mg catalyst, 10 % v/v lactic acid                                               | 500 W metal halide lamp ( $\lambda \geq 420$ nm)        | 1324       | 132400       | 47.0% at 420 nm<br>4.0% at 460 nm | [23]             |
| 5 at.% MoS <sub>2</sub> /CdS                   | 80 mg catalyst, 10 % v/v lactic acid                                               | 300 W Xe lamp ( $\lambda \geq 420$ nm)                  | 20         | 250          | 3.7% at 420 nm                    | [24]             |
| 3 wt.% 1T- MoS <sub>2</sub> QDs/CdS            | 2 mg catalyst, 10 % v/v lactic acid                                                | 500 W metal halide lamp ( $\lambda \geq 420$ nm)        | 263        | 131700       | 50.4% at 420 nm                   | [25]             |
| 70 wt.% MoS <sub>2</sub> NSs/ CdS nanowires    | 50 mg catalyst, 10 % v/v triethanolamine                                           | 300 W Xe lamp                                           | 90         | 1790         | -                                 | [26]             |
| 7 wt.% 2D/2D MoS <sub>2</sub> /CdS             | 10 mg catalyst, 10 % v/v lactic acid                                               | 300 W Xe lamp ( $\lambda \geq 420$ nm)                  | 184        | 18430        | 3.5% at 450 nm                    | [27]             |
| <b>20 wt.% MoS<sub>2</sub> NSs/CdS NCAs</b>    | <b>20 mg catalyst, 0.35 M Na<sub>2</sub>S, 0.25 M Na<sub>2</sub>SO<sub>3</sub></b> | <b>300 W Xe lamp (<math>\lambda \geq 420</math> nm)</b> | <b>390</b> | <b>19500</b> | <b>51.2% at 420 nm</b>            | <b>This work</b> |

**Table S2.** Fitting results of the EIS Nyquist data of pristine and MoS<sub>2</sub>-modified CdS NCAs.

| Sample                     | R <sub>s</sub><br>(Ω) | C <sub>dl</sub><br>(F) | R <sub>ct</sub><br>(kΩ) | Z <sub>w</sub><br>(kΩ•s <sup>-1/2</sup> ) | χ <sup>2</sup>       |
|----------------------------|-----------------------|------------------------|-------------------------|-------------------------------------------|----------------------|
| CdS NCAs                   | 21.90                 | 16.99×10 <sup>-6</sup> | 13.5                    | 61.9                                      | 3.8×10 <sup>-5</sup> |
| 5-MoS <sub>2</sub> /CdS    | 17.23                 | 21.84×10 <sup>-6</sup> | 6.3                     | 3.6                                       | 4.6×10 <sup>-4</sup> |
| 10-MoS <sub>2</sub> /CdS   | 18.38                 | 23.05×10 <sup>-6</sup> | 5.6                     | 3.6                                       | 5.3×10 <sup>-4</sup> |
| 15-MoS <sub>2</sub> /CdS   | 26.52                 | 40.36×10 <sup>-6</sup> | 5.3                     | 1.7                                       | 3.1×10 <sup>-5</sup> |
| 20-MoS <sub>2</sub> /CdS   | 14.03                 | 17.72×10 <sup>-6</sup> | 2.7                     | 3.5                                       | 9.7×10 <sup>-4</sup> |
| 25-MoS <sub>2</sub> /CdS   | 11.64                 | 20.91×10 <sup>-6</sup> | 4.5                     | 3.1                                       | 5.5×10 <sup>-4</sup> |
| 20-MoS <sub>2</sub> /CdS_b | 9.79                  | 17.70×10 <sup>-6</sup> | 5.2                     | 4.5                                       | 6.8×10 <sup>-4</sup> |

**Table S3.** PL lifetime biexponential decay model fitting parameters and calculated average lifetimes for the CdS, 20-MoS<sub>2</sub>/CdS and 20-MoS<sub>2</sub>/CdS\_b NCAs.

| Sample                     | τ <sub>1</sub><br>(ns) | τ <sub>2</sub><br>(ns) | α <sub>1</sub><br>(%) | α <sub>2</sub><br>(%) | τ <sub>av</sub> <sup>[a]</sup><br>(ns) |
|----------------------------|------------------------|------------------------|-----------------------|-----------------------|----------------------------------------|
| CdS NCAs                   | 0.35                   | 3.97                   | 77.6                  | 22.4                  | 3.12                                   |
| 20-MoS <sub>2</sub> /CdS   | 0.51                   | 4.85                   | 64.8                  | 35.2                  | 4.15                                   |
| 20-MoS <sub>2</sub> /CdS_b | 0.49                   | 4.09                   | 63.8                  | 36.2                  | 3.46                                   |

$$\tau_{av} = \frac{(\sum_i \alpha_i \tau_i^2)}{(\sum_i \alpha_i \tau_i)} \quad (i = 1, 2).$$

<sup>[a]</sup>The average lifetime (τ<sub>av</sub>) was calculated by the equation:

## Supporting Figures

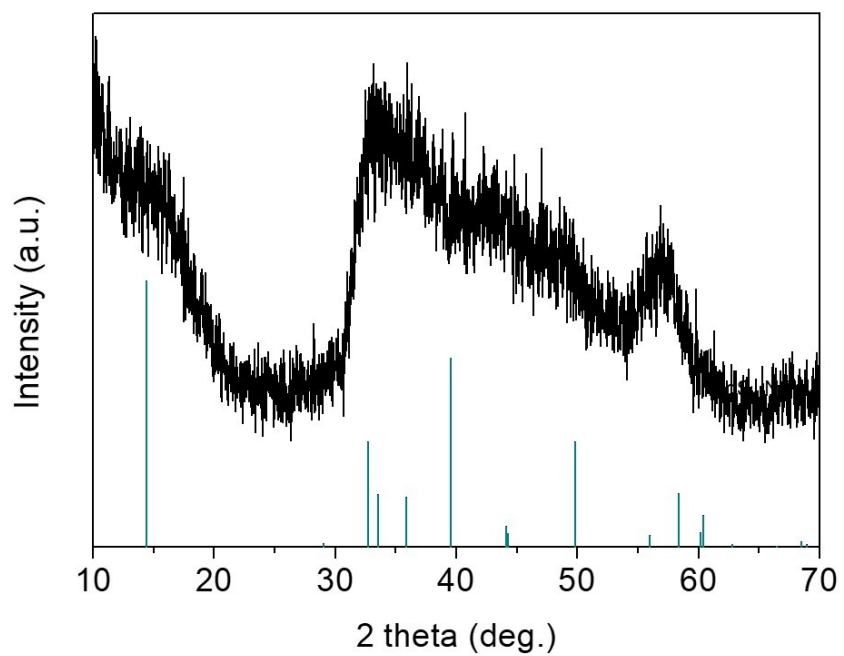

**Fig. S1** XRD pattern of the MoS<sub>2</sub> NSs. The XRD pattern shows diffraction peaks that corresponds to the hexagonal (2H) phase of MoS<sub>2</sub> (JCPDS card no. 77-1716).

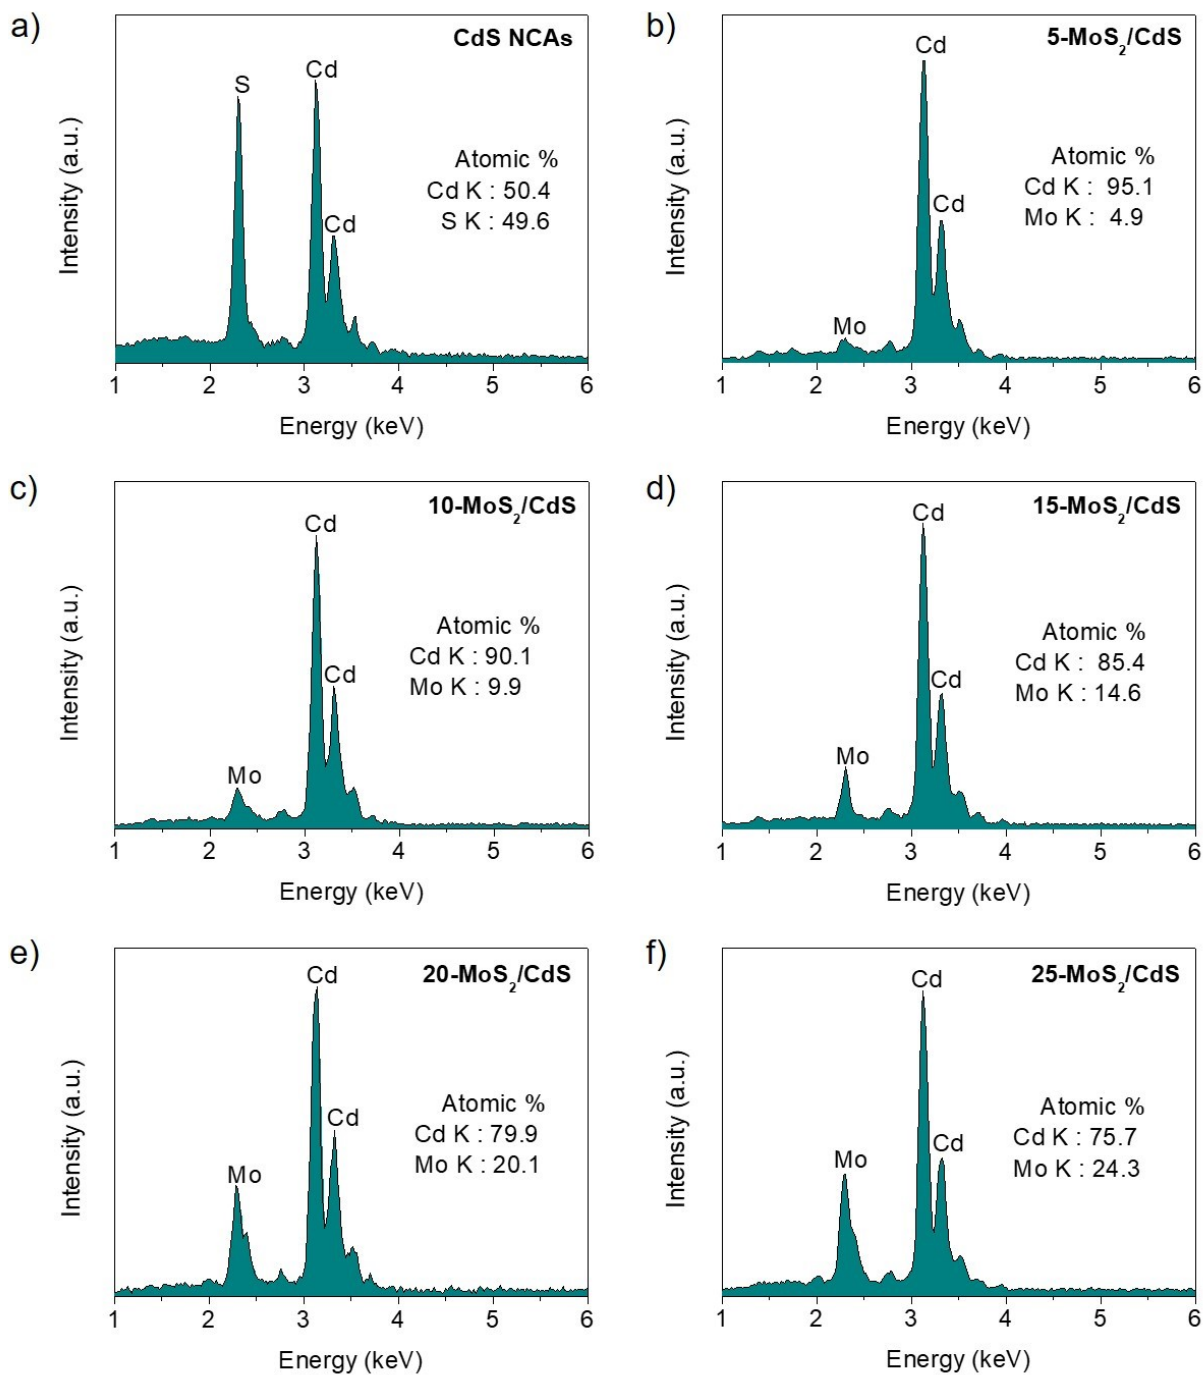

**Fig. S2** Typical EDS spectra of the mesoporous CdS and *n*-MoS<sub>2</sub>/CdS NCAs catalysts.

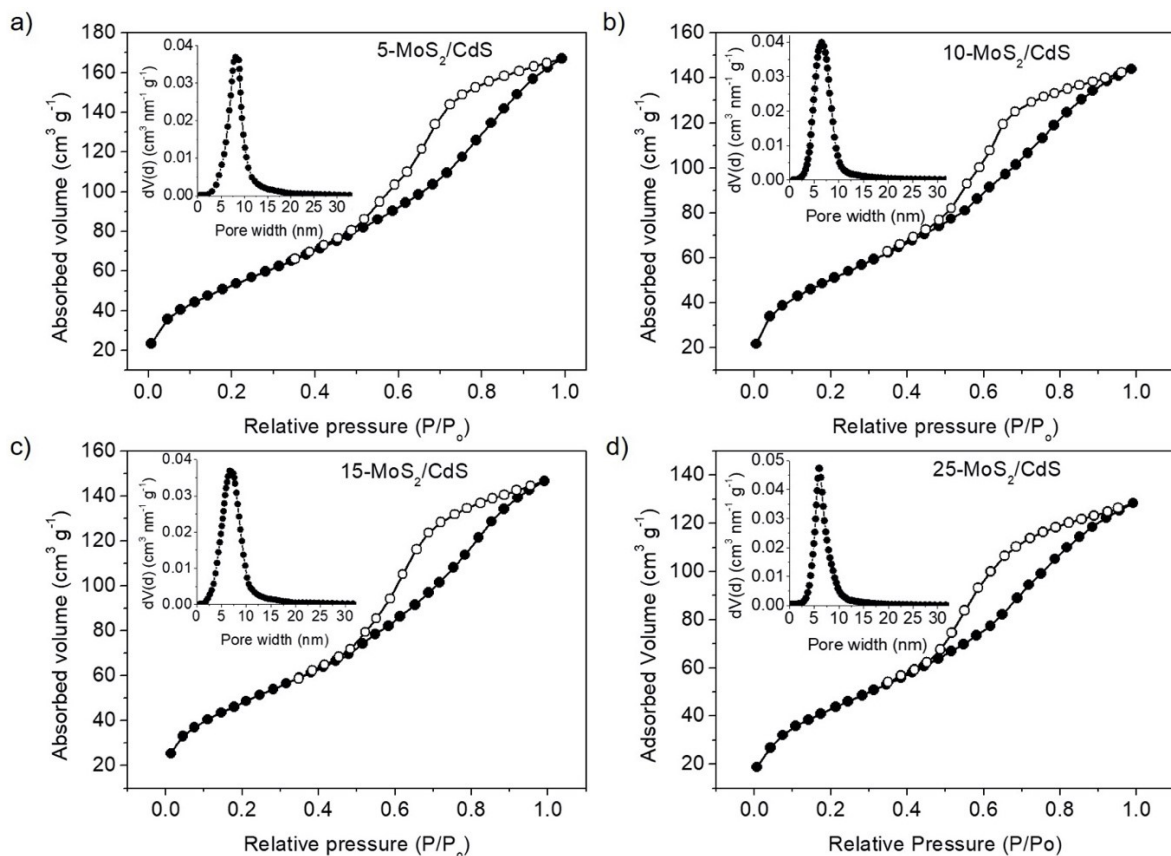

**Fig. S3**  $N_2$  adsorption (filled cycles) and desorption (open cycles) isotherms at  $-196^\circ\text{C}$  for the mesoporous (a) 5- $\text{MoS}_2/\text{CdS}$ , (b) 10- $\text{MoS}_2/\text{CdS}$ , (c) 15- $\text{MoS}_2/\text{CdS}$  and (d) 25- $\text{MoS}_2/\text{CdS}$  NCAs. Insets: The corresponding NLDFT pore size distributions calculated from the adsorption branch of isotherms.

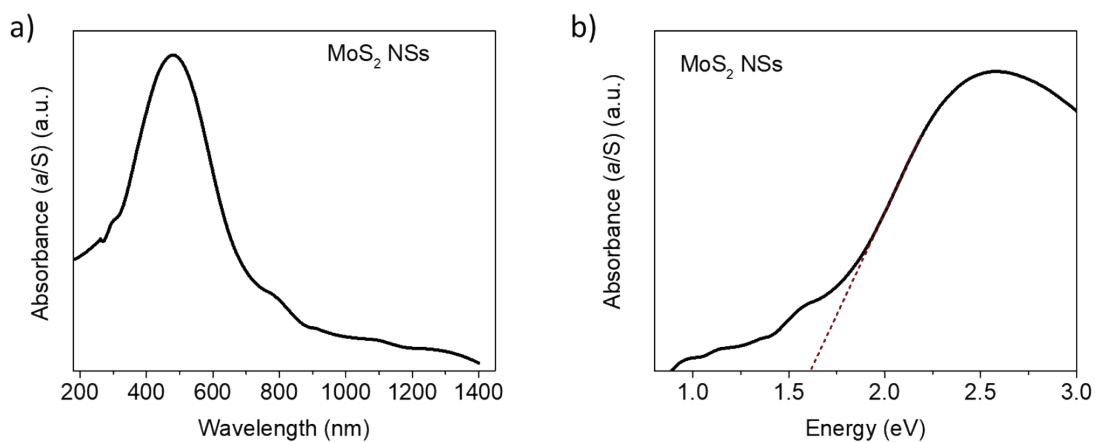

**Fig. S4** (a) Optical absorption spectrum and (b) the corresponding absorbance vs energy plot of the as-synthesized  $\text{MoS}_2$  NSs.

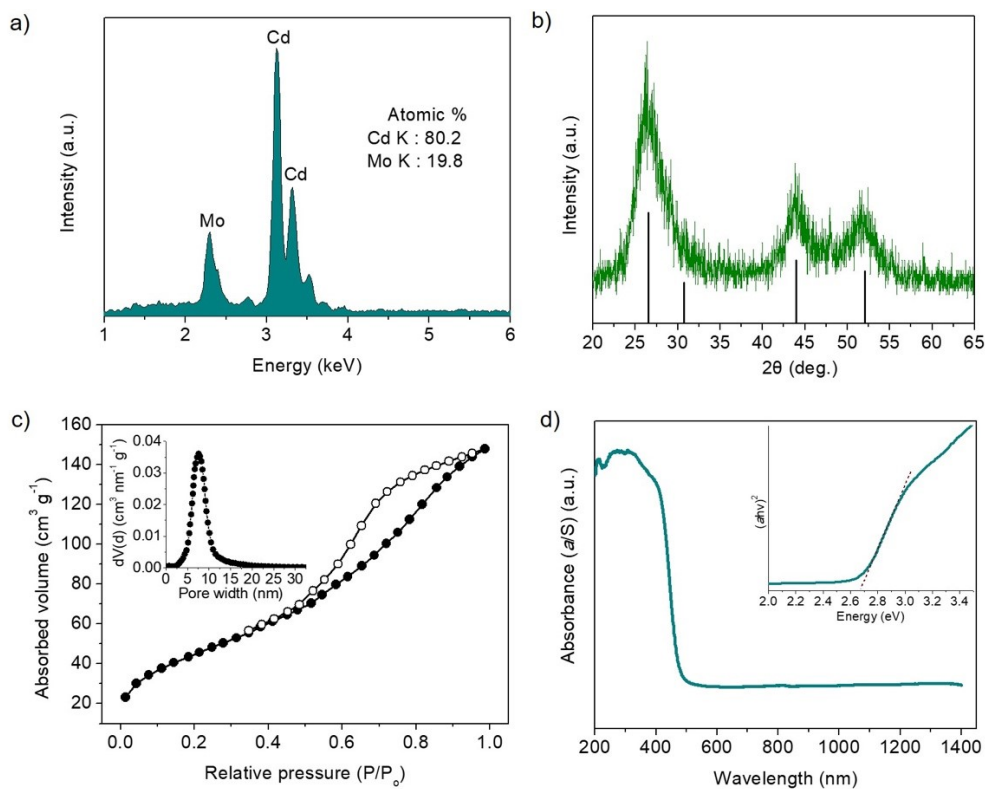

**Fig. S5** (a) Typical EDS spectrum, (b) XRD pattern showing also the standard diffraction lines of zinc-blende CdS according to the JCPDS card No.42-1411, (c) Nitrogen adsorption-desorption isotherms at  $-196$  °C and the corresponding NLDFT pore-size distribution plot (inset), and (d) optical absorption spectrum and Tauc plot (inset) of the mesoporous 20-MoS<sub>2</sub>/CdS<sub>b</sub> sample.

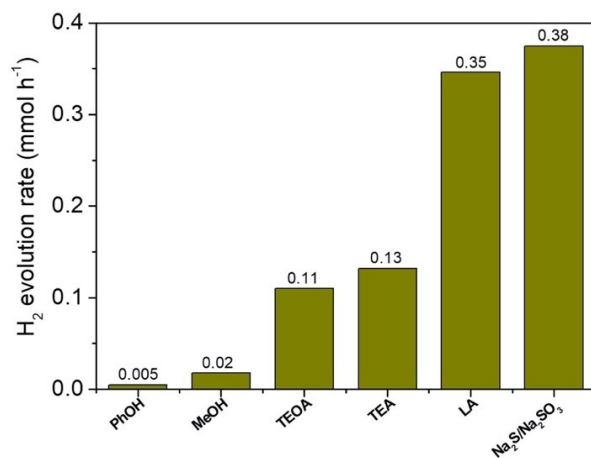

**Fig. S6** Photocatalytic H<sub>2</sub> evolution rates for the mesoporous 20-MoS<sub>2</sub>/CdS catalyst using different sacrificial reagents: phenol (PhOH, 0.35 M), methanol (MeOH, 10% v/v), triethanolamine (TEOA, 10% v/v), triethylamine (TEA, 10% v/v), lactic acid (LA, 10% v/v) and Na<sub>2</sub>S/Na<sub>2</sub>SO<sub>3</sub> (0.35 M/0.25 M) aqueous solution. All photocatalytic reactions were performed as follows: 20 mg of catalyst dispersed in a 20 mL aqueous solution containing the sacrificial reagent; 300 W Xe light radiation with a long-pass cut-off filter allowing  $\lambda \geq 420$  nm,  $20 \pm 2$  °C.



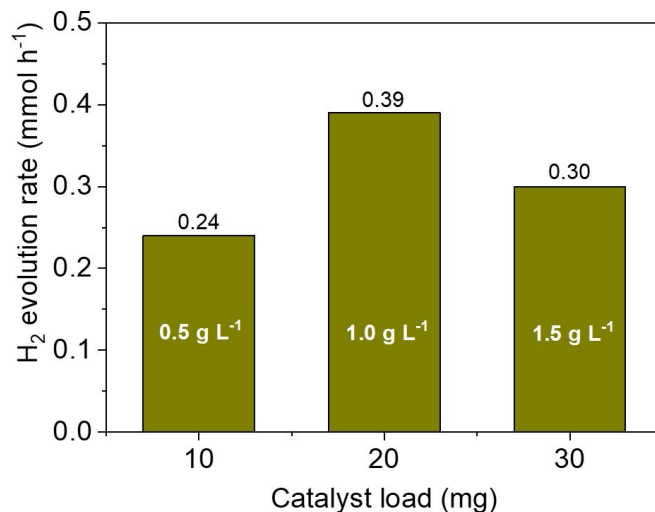

**Fig. S7** Photocatalytic H<sub>2</sub> evolution activities for different loadings of 20-MoS<sub>2</sub>/CdS catalyst. Experimental conditions: 10–30 mg of catalyst, 20 mL aqueous solution containing 0.35 M Na<sub>2</sub>S and 0.25 M Na<sub>2</sub>SO<sub>3</sub>, 300 W Xenon light radiation with a long-pass cut-off filter ( $\lambda \geq 420$  nm), 20  $\pm$  2 °C.

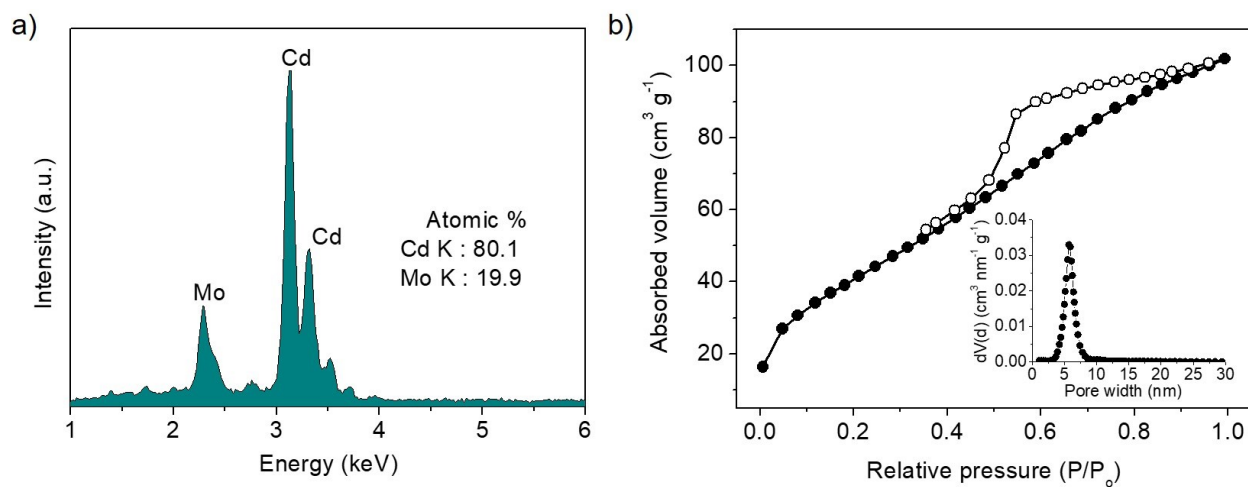

**Fig. S8** (a) Typical EDS spectrum and (b) N<sub>2</sub> adsorption-desorption isotherms at – 196 °C and the corresponding NLDFT pore-size distribution (inset) for the 20-MoS<sub>2</sub>/CdS catalyst retrieved after 15 h of photocatalytic reaction.

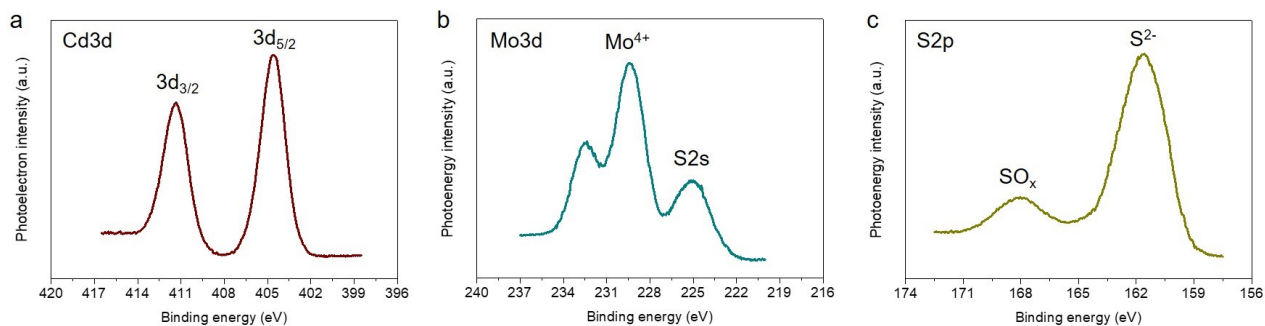

**Fig. S9** Typical XPS core-level spectra of the (a) Cd 3d, (b) Mo 3d and (c) S 2p regions of the reused 20-MoS<sub>2</sub>/CdS catalyst.

The Cd 3d XPS spectrum shows a doublet peak at 404.4 and 411.3 ± 0.2 eV, corresponding to the Cd 3d<sub>5/2</sub> and Cd 3d<sub>3/2</sub> core levels components of Cd<sup>2+</sup> in CdS, respectively. The Mo 3d XPS spectrum shows two peaks at binding energies 229.3 and 232.5 ± 0.2 eV, which are assigned respectively to the 3d<sub>5/2</sub> and 3d<sub>3/2</sub> spin-orbit peaks of Mo<sup>4+</sup> in MoS<sub>2</sub>. The peak observed at 225.3 ± 0.2 eV is assigned to the S 2s line of sulfide (S<sup>2-</sup>) ions. The S 2p XPS spectrum (**Fig. 2d**) shows a broad signal at 161.5 ± 0.3 eV due to the S<sup>2-</sup> ions. In addition, a small amount of sulfur species at certain higher oxidation states is, however, observed in the surface of CdS and MoS<sub>2</sub> NSs, deducing from the weak peak at 168.1 ± 0.3 eV.

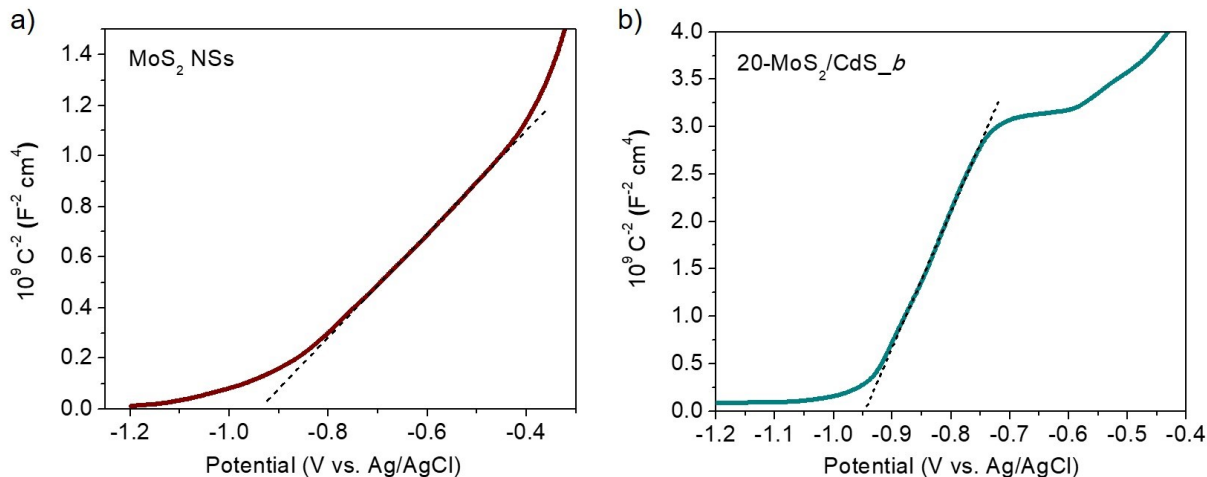

**Fig. S10** Mott-Schottky plots of (a) as-prepared MoS<sub>2</sub> NSs and (b) mesoporous 20-MoS<sub>2</sub>/CdS<sub>b</sub> catalyst.

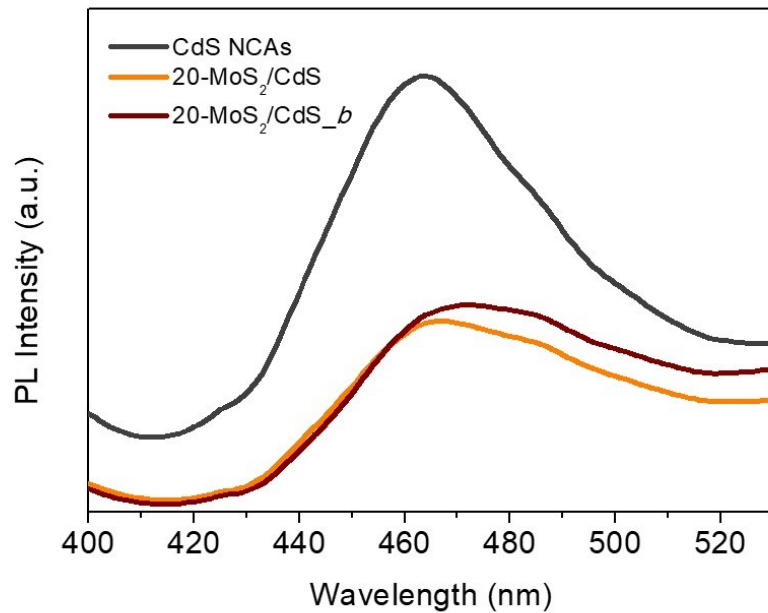

**Fig. S11** Room-temperature PL spectra of pristine and MoS<sub>2</sub>-modified CdS NCAs with 20 wt.% of MoS<sub>2</sub> NSs (20-MoS<sub>2</sub>/CdS) and MoS<sub>2</sub> bulk flakes (20-MoS<sub>2</sub>/CdS<sub>b</sub>). PL emission spectra were obtained at a concentration of 0.5 mg mL<sup>-1</sup> in water with an excitation wavelength of 375 nm.

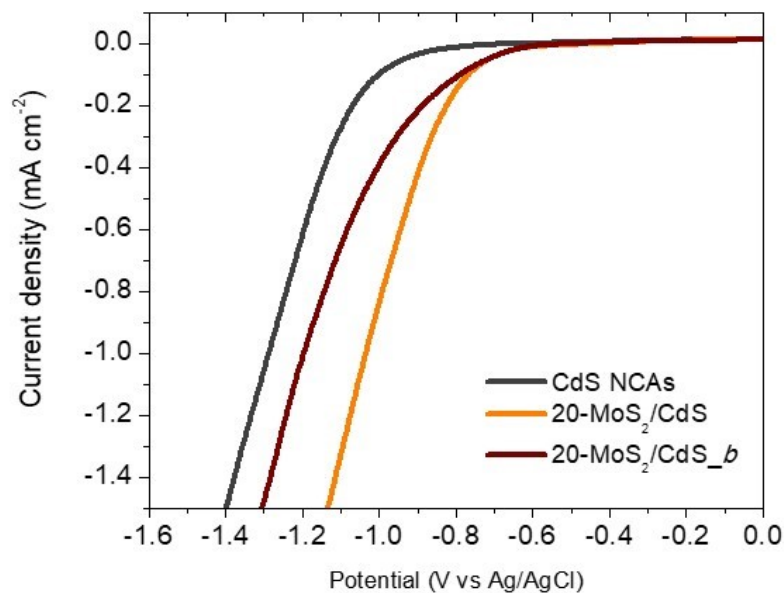

**Fig. S12** J–V plots of CdS, 20-MoS<sub>2</sub>/CdS and 20-MoS<sub>2</sub>/CdS<sub>b</sub> NCAs.

## References

- [1] X. Zong, G. Wu, H. Yan, G. Ma, J. Shi, F. Wen, L. Wang, C. Li, Photocatalytic H<sub>2</sub> Evolution on MoS<sub>2</sub>/CdS Catalysts under Visible Light Irradiation, *J. Phys. Chem. C*, 2019, **114**, 1963–1968.
- [2] X. Zong, H. Yan, G. Wu, G. Ma, F. Wen, L. Wang, C. Li, Enhancement of Photocatalytic H<sub>2</sub> Evolution on CdS by Loading MoS<sub>2</sub> as Cocatalyst under Visible Light Irradiation, *J. Am. Chem. Soc.*, 2008, **130**, 7176–7177.
- [3] G. Chen, D. Li, F. Li, Y. Fan, H. Zhao, Y. Luo, R. Yu, Q. Meng Ball-milling combined calcination synthesis of MoS<sub>2</sub>/CdS photocatalysts for high photocatalytic H<sub>2</sub> evolution activity under visible light irradiation, *Appl. Catal. A: Gen.*, 2012, **443–444**, 138–144.
- [4] X.-Y. Liu, H. Yu, X. Quan, S. Chen, Green Synthesis of Feather-Shaped MoS<sub>2</sub>/CdS Photocatalyst for Effective Hydrogen Production, *Int. J. Photoenergy*, 2013, 1–5.
- [5] J. Zhang, Z. Zhu, X. Feng, Construction of Two-Dimensional MoS<sub>2</sub>/CdS p-n Nanohybrids for Highly Efficient Photocatalytic Hydrogen Evolution, *Chem. Eur. J.*, 2014, **20**, 10632–10635.
- [6] J. Xiong, Y. Liu, D. Wang, S. Liang, W. Wu, L. Wu, An efficient cocatalyst of defect-decorated MoS<sub>2</sub> ultrathin nanoplates for the promotion of photocatalytic hydrogen evolution over CdS nanocrystal, *J. Mater. Chem. A*, 2015, **3**, 12631–12635.
- [7] K. Chang, M. Li, T. Wang, S. Ouyang, P. Li, L. Liu, J. Ye, Drastic Layer-Number-Dependent Activity Enhancement in Photocatalytic H<sub>2</sub> Evolution over nMoS<sub>2</sub>/CdS (n ≥ 1) Under Visible Light, *Adv. Energy Mater.*, 2015, **5**, 1402279.
- [8] J. Xu, X. Cao, Characterization and mechanism of MoS<sub>2</sub>/CdS composite photocatalyst used for hydrogen production from water splitting under visible light, *Chem. Eng. J.*, 2015, **260**, 642–648.
- [9] D. Lang, T. Shen, Q. Xiang, Roles of MoS<sub>2</sub> and Graphene as Cocatalysts in the Enhanced Visible-Light Photocatalytic H<sub>2</sub> Production Activity of Multiarmed CdS Nanorods, *ChemCatChem*, 2015, **7**, 943–951.
- [10] F. Ma, Y. Wu, Y. Shao, Y. Zhong, J. Lv, X. Hao, 0D/2D nanocomposite visible light photocatalyst for highly stable and efficient hydrogen generation via recrystallization of CdS on MoS<sub>2</sub> nanosheets, *Nano Energy*, 2016, **27**, 466–474.
- [11] J. He, L. Chen, F. Wang, Y. Liu, P. Chen, C.-T. Au, S.-F. Yin, CdS Nanowires Decorated with Ultrathin MoS<sub>2</sub> Nanosheets as an Efficient Photocatalyst for Hydrogen Evolution, *ChemSusChem*, 2016, **9**, 624–630.
- [12] X. Zhou, J. Huang, H. Zhang, H. Sun, W. Tu, Controlled synthesis of CdS nanoparticles and their surface loading with MoS<sub>2</sub> for hydrogen evolution under visible light, *Int. J. Hydrog. Energy*, 2016, **41**, 14758–14767.
- [13] X.-L. Yin, L.-L. Li, W.-J. Jiang, Y. Zhang, X. Zhang, L.-J. Wan, J.-S. Hu, MoS<sub>2</sub>/CdS Nanosheets-on-Nanorod Heterostructure for Highly Efficient Photocatalytic H<sub>2</sub> Generation under Visible Light Irradiation, *ACS Appl. Mater. Interfaces*, 2016, **8**, 15258–15266.
- [14] D. P. Kumar, S. Hong, D. A. Reddy, T. K. Kim, Noble metal-free ultrathin MoS<sub>2</sub> nanosheet-decorated CdS nanorods as an efficient photocatalyst for spectacular hydrogen evolution under solar light irradiation, *J. Mater. Chem. A*, 2016, **4**, 18551–18558.

- [15] S. Ma, J. Xie, J. Wen, K. He, X. Li, W. Liu, X. Zhang, Constructing 2D layered hybrid CdS nanosheets/MoS<sub>2</sub> heterojunctions for enhanced visible-light photocatalytic H<sub>2</sub> generation, *Appl. Surf. Sci.*, 2017, **391**, 580–591.
- [16] A. Wu, C. Tian, Y. Jiao, Q. Yan, G. Yang, H. Fu, Sequential two-step hydrothermal growth of MoS<sub>2</sub>/CdS core-shell heterojunctions for efficient visible light-driven photocatalytic H<sub>2</sub> evolution, *Appl. Catal. B: Environ.*, 2017, **203**, 955–963.
- [17] X. Hai, W. Zhou, S. Wang, H. Pang, K. Cheng, F. Ichihara, J. Ye, Rational design of freestanding MoS<sub>2</sub> monolayers for hydrogen evolution reaction, *Nano Energy*, 2017, **39**, 409–417.
- [18] S. Zhang, H. Yang, H. Gao, R. Cao, J. Huang, X. Xu, One-pot synthesis of CdS irregular nanospheres hybridized with oxygen-incorporated defect-rich MoS<sub>2</sub> ultrathin nanosheets for efficient photocatalytic hydrogen evolution, *ACS Appl. Mater. Interfaces*, 2017, **9**, 23635–23646.
- [19] L. Zhao, J. Jia, Z. Yang, J. Yu, A. Wang, Y. Sang, W. Zhou, H. Liu, One-step synthesis of CdS nanoparticles/MoS<sub>2</sub> nanosheets heterostructure on porous molybdenum sheet for enhanced photocatalytic H<sub>2</sub> evolution, *Appl. Catal. B: Environ.*, 2017, **210**, 290–296.
- [20] B. Chai, M. Xu, J. Yan, Z. Ren, Remarkably enhanced photocatalytic hydrogen evolution over MoS<sub>2</sub> nanosheets loaded on uniform CdS nanospheres, *Appl. Surf. Sci.*, 2018, **430**, 523–530.
- [21] L. Jiang, L. Wang, G. Xu, L. Gu, Y. Yuan, A microwave-assisted thermolysis route to single-step preparation of MoS<sub>2</sub>/CdS composite photocatalysts for active hydrogen generation, *Sustain. Energy Fuels*, 2018, **2**, 430–435.
- [22] J. Sun, L. Duan, Q. Wu, W. Yao, Synthesis of MoS<sub>2</sub> quantum dots cocatalysts and their efficient photocatalytic performance for hydrogen evolution, *Chem. Eng. J.*, 2018, **332**, 449–455.
- [23] X.-H. Zhang, N. Li, J. Wu, Y.-Z. Zheng, X. Tao, Defect-rich O-incorporated 1T-MoS<sub>2</sub> nanosheets for remarkably enhanced visible-light photocatalytic H<sub>2</sub> evolution over CdS: The impact of enriched defects, *Appl. Catal. B: Environ.*, 2018, **229**, 227–236.
- [24] Z.-W. Zhang, Q.-H. Li, X.-Q. Qiao, D. Hou, D.-S. Li, One-pot hydrothermal synthesis of willow branch-shaped MoS<sub>2</sub>/CdS heterojunctions for photocatalytic H<sub>2</sub> production under visible light irradiation, *Chin. J. Catal.*, 2019, **40**, 371–379.
- [25] X. Li, X. Lv, N. Li, J. Wu, Y.-Z. Zheng, X. Tao, One-step hydrothermal synthesis of high-percentage 1T-phase MoS<sub>2</sub> quantum dots for remarkably enhanced visible-light-driven photocatalytic H<sub>2</sub> evolution, *Appl. Catal. B: Environ.*, 2019, **243**, 76–85.
- [26] W. Zhao, J. Liu, Z. Ding, J. Zhang, X. Wang, Optimal synthesis of platinum-free 1D/2D CdS/MoS<sub>2</sub> (CM) heterojunctions with improved photocatalytic hydrogen production performance, *J. Alloys Compd.*, 2020, **813**, 152234.
- [27] M. Xiong, J. Yan, B. Chai, G. Fan, G. Song, Liquid exfoliating CdS and MoS<sub>2</sub> to construct 2D/2D MoS<sub>2</sub>/CdS heterojunctions with significantly boosted photocatalytic H<sub>2</sub> evolution activity, *J. Mater. Sci. Technol.*, 2020, **56**, 179–188.
